# Supplementary material for: Combining Classification with fMRI-Derived Complex Network Measures for Potential Neurodiagnostics
Source: PubMed Central journal article supplement (PMC3646016; doi:10.1371/journal.pone.0062867), 2013-05-06
Supplement: pone.0062867.s001.pdf [file pone.0062867.s001.pdf]

FEATURE NUMBER

4320

480

240

48

6

3

1

assortativity

local efficiency

clustering coefficient

transitivity

global efficiency

modularity

small-world ratio

characteristic path length

closeness centrality

NETWORK MEASURE

Binary

Weighted

GRAPH TYPE

10%

20%

30%

40%

50%

CONNECTION FRACTION

-3TR

-2TR

-TR

0

+TR

+2TR

+3TR

max

INTERACTIONS

Linear correlation

Partial correlation

CONNECTIVITY METRIC

0-1/TR Hz

0.01-0.1 Hz

0.03-0.06 Hz

FREQUENCY DOMAIN

Time series array
