# Supplementary material for: Combining Classification with fMRI-Derived Complex Network Measures for Potential Neurodiagnostics
Source: PubMed Central journal article supplement (PMC3646016; doi:10.1371/journal.pone.0062867), 2013-05-06
Supplement: pone.0062867.s002.pdf [file pone.0062867.s002.pdf]

# Evaluate classifier performance through leave one out cross validation

Set aside one example as a test fold for evaluating classifier accuracy

Scale data: for each feature compute the mean and standard deviation across the training samples ( $n-1$  examples) and use to scale all examples

Carry out leave one out cross validation to select classifier parameters: the soft margin  $C$  and number of feature families (ROI/graph)

Set aside one example as a test fold for evaluating classifier accuracy

Rank features according to their between group  $t^2$  statistic as derived from the training set ( $n-2$  examples) to leave the top 25% features in each family (ROI/graph)

Evaluate SVM performance on training sample over all the range of classifier parameters

Compute the optimal weighted sum of feature kernels using block diagonal optimization and train SVM and evaluate on test sample

. Use the learned weights to remove the feature family with the least contribution

|feature families|  
x  
|[ $c_1 \dots c_k$ ]|

$n-1$   
times

$n$   
times

Compute accuracy over the  $n-1$  training folds for every conjunction of  $C=c$  and  $FeatNum=k$

Choose  $C=c_{opt}$  and  $FeatNum_{opt}=[k_1 \dots k_m]$  that attained maximal accuracy

Rank features according to their between group  $t^2$  statistic as derived from the training set ( $n-1$  examples) to leave the top 25% features in each family

Compute the optimal weighted sum of feature kernels using block diagonal optimization

Train SVM and remove least contributing feature family

For all  
feature  
families

Evaluate SVM with  $c_{opt}$  and  $FeatNum=[k_1 \dots k_m]$  on withheld subject establishing correctness through a (binary) majority vote

Establish feature accuracy across the  $n$  training folds, as well as the average feature family ranking.
